# Supplementary material for: Selective hydrogenolysis of phenols and phenyl ethers to arenes through direct C–O cleavage over ruthenium–tungsten bifunctional catalysts
Source: Royal Society of Chemistry journal article supplement (doi:10.1039/c5gc00326a), 2015-01-01
Supplement: c5gc00326a1.pdf [file c5gc00326a1.pdf]

## Selective Hydrogenolysis of Phenols and Phenyl Ethers to Arenes through Direct C-O Cleavage over Ruthenium-Tungsten Bifunctional Catalysts.

### Supporting Information

#### 1. Characterization of the catalysts

**Table S1.** BET analysis of several catalysts.

| entry | catalyst     | $S_{\text{BET}}$ ( $\text{m}^2/\text{g}$ ) | $D_p$ ( $\text{\AA}$ ) | $V_p$ ( $\text{cm}^3/\text{g}$ ) |
|-------|--------------|--------------------------------------------|------------------------|----------------------------------|
| 1     | SiAl         | 429.5                                      | 60.93                  | 0.654                            |
| 2     | 5Ru-30W/SiAl | 202.5                                      | 109.8                  | 0.556                            |

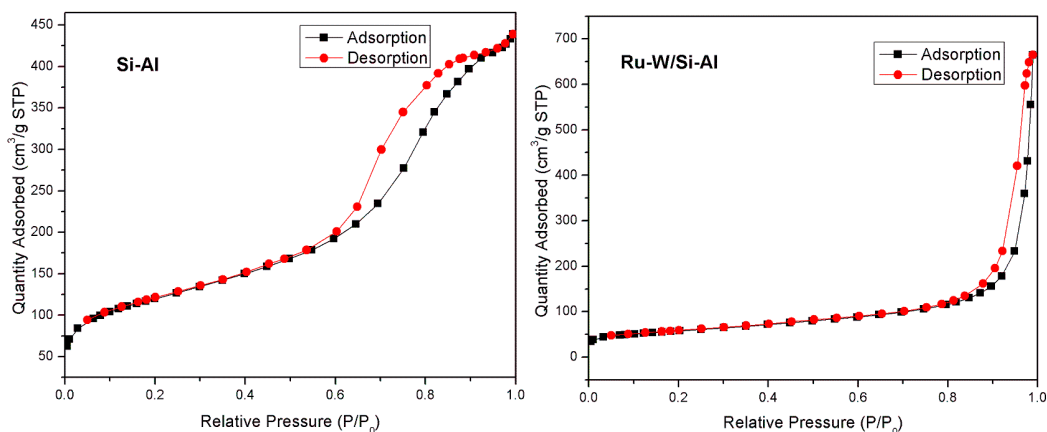

**Figure S1.**  $\text{N}_2$  adsorption isotherms for SiAl and Ru-W/SiAl

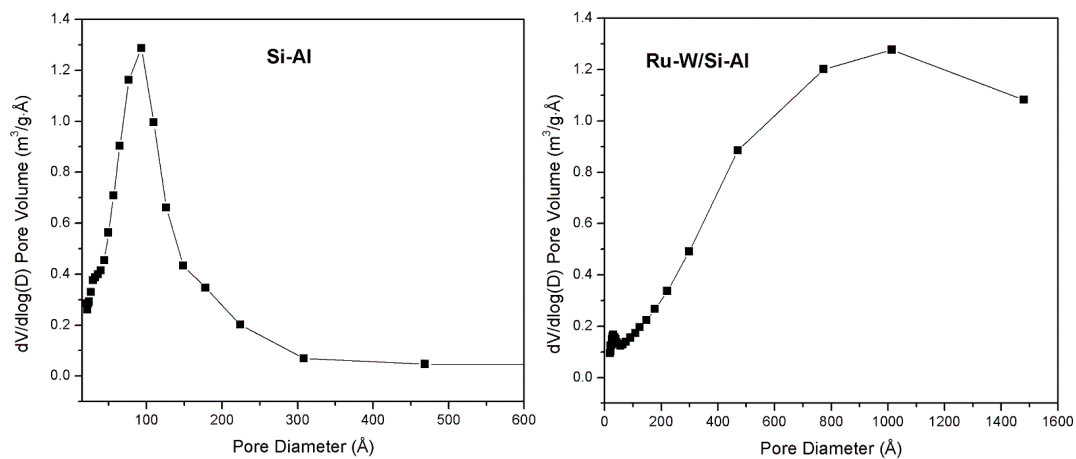

**Figure S2.** BJH pore size distributions for SiAl and Ru-W/SiAl

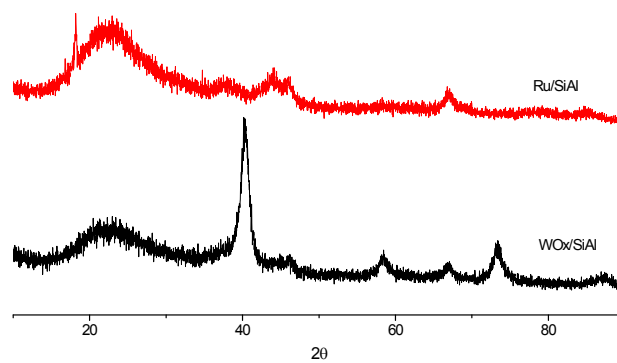

Figure S3. XRD of the Ru/SiAl and WO<sub>x</sub>/ SiAl catalyst

### STEM- Elemental Mapping

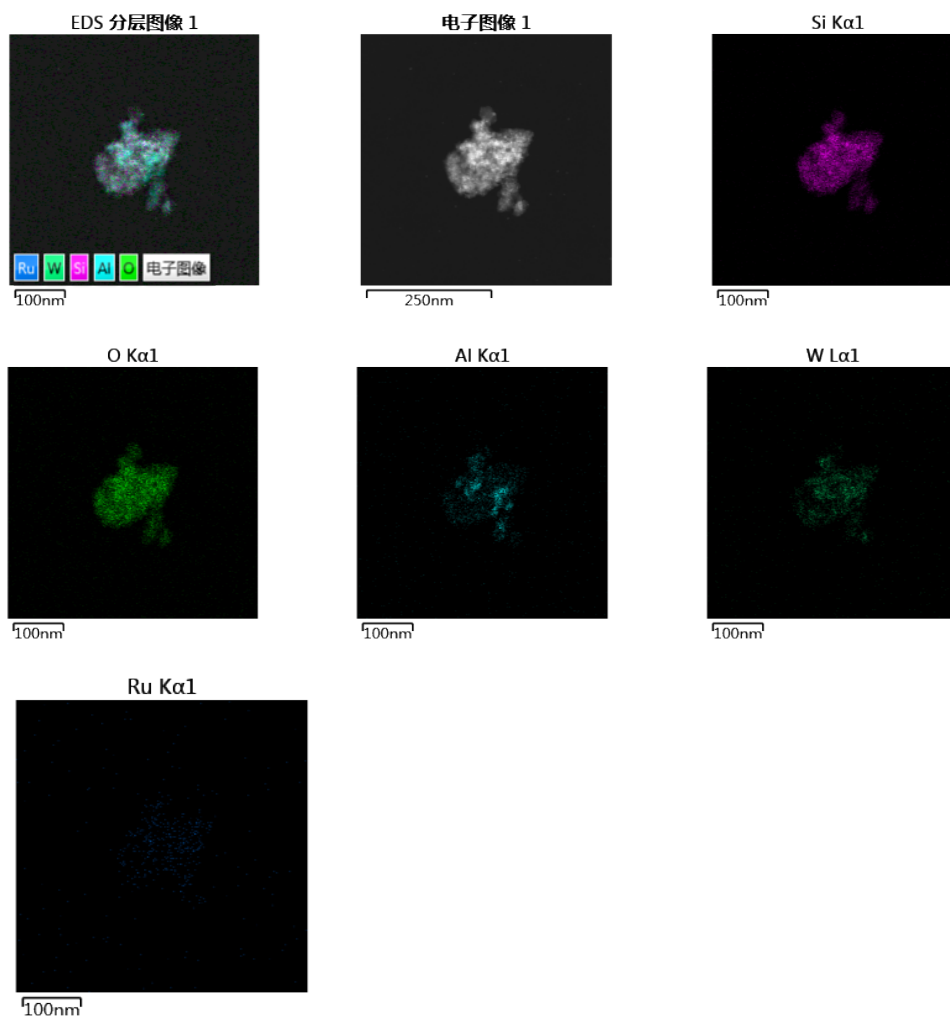

Scheme S1. Elemental Mapping of the Ru-W/SiAl catalyst.

## 2. Experimental section

### Indification of phenols separated from pyrolysis lignin

The phenols extracted from the pyrolysis of rice husk were subjected to the qualitative and quantitative analysis by GC-MS and GC.

*GC-MS spectra of phenols:*

**Figure S4.** GC-MS analysis of phenols from pyrolysis lignin.

**Table S2.** The main phenols separated from the pyrolysis lignin. (The total mixture was 100 mg)

|                  |                                                                                     |                                                                                     |                                                                                     |                                                                                      |                                                                                       |
|------------------|-------------------------------------------------------------------------------------|-------------------------------------------------------------------------------------|-------------------------------------------------------------------------------------|--------------------------------------------------------------------------------------|---------------------------------------------------------------------------------------|
| <b>Aromatics</b> | 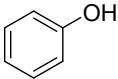 |  |  |  |  |
| Content/mg       | 3.66                                                                                | 10.38                                                                               | 10.54                                                                               | 4.08                                                                                 | 18.94                                                                                 |
| <b>Aromatics</b> |  |  |  |  |  |
| Content/mg       | 6.06                                                                                | 6.62                                                                                | 6.41                                                                                | 2.56                                                                                 | 3.15                                                                                  |

The mixture was analyzed by GC and the contents were calculated by adding the internal standard.

Total detected aromatics: 72.4 mg.

The other unknown products 27.6 mg

Total detected aromatics yield:

$$\frac{\text{total detected aromatics}}{\text{The mixture from the extracted bio-oil}} = \frac{72.4 \text{ mg}}{100 \text{ mg}} = 72.4 \%$$

**Table S3.** The main arene products from the hydrogenolysis of phenols. (Calculated as the starting phenols 100 mg)

|                     |                                                                                   |                                                                                   |                                                                                   |                                                                                    |                    |
|---------------------|-----------------------------------------------------------------------------------|-----------------------------------------------------------------------------------|-----------------------------------------------------------------------------------|------------------------------------------------------------------------------------|--------------------|
| <b>Aromatics</b>    |  |  |  |  | total arenes       |
| Content/mg          | 6.05                                                                              | 7.13                                                                              | 10.05                                                                             | 4.06                                                                               | 27.29              |
| <b>Cyclo-alknes</b> |  |  |  |  | total cyclo-alknes |
| Content/mg          | 0.93                                                                              | 0.87                                                                              | 1.13                                                                              | 0.76                                                                               | 3.69               |

Other by products and the unreacted phenols were sum up to ~5.43 mg. The total weight of the detected molecules (crude products) after the reaction was ~36.41 mg.

The crude products yield after the hydrogenolysis reactions was:

$$\frac{\text{Crude products}}{\text{Starting phenols}} \times 100\% = \frac{36.41\text{mg}}{100\text{ mg}} = 36.4\%$$

Selectivities of the arenes, cycloalkanes and others in the final mixture (crude products) after the hydrogenolysis reaction:

$$\text{Arenes selectivity} = \frac{\text{Arenes}}{\text{Crude products}} \times 100\% = \frac{27.29\text{ mg}}{36.41\text{ mg}} = 74.9\%$$

$$\text{Cycloalkanes selectivity} = \frac{\text{Cycloalkanes}}{\text{Crude products}} \times 100\% = \frac{3.69\text{ mg}}{36.41\text{ mg}} = 10.1\%$$

$$\text{Others selectivity} = 1 - (74.9\% + 10.1\%) = 15\%$$

**Figure S5.** GC-MS analysis of reactions mixture at different reaction times.

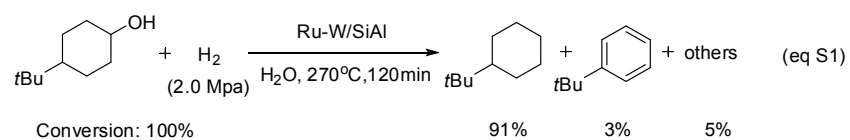

**Scheme S2.** Hydrogenolysis of the ring hydrogenation intermediate over Ru-W catalyst.
